# Supplementary material for: Identifying and Evaluating Young Children with Developmental Central Hypotonia: An Overview of Systematic Reviews and Tools
Source: MDPI journal article supplement (doi:10.3390/healthcare12040493), 2024-02-18
Supplement: s1 [file s1]

## Supplementary Materials S1: Quality and risk-of-bias ratings

### 1. JBI Umbrella review consensus ratings

| Items                                                                               | Naidoo 2013<br>[15] | Goo et al., 2017<br>[41] | De Santos<br>Moreno et al.,<br>2023 [42] |
|-------------------------------------------------------------------------------------|---------------------|--------------------------|------------------------------------------|
| 1. Is the review question clearly and explicitly stated?                            | UNCLEAR             | YES                      | YES                                      |
| 2. Were the inclusion criteria appropriate for the review question?                 | NO                  | YES                      | UNCLEAR                                  |
| 3. Was the search strategy appropriate?                                             | YES                 | YES                      | UNCLEAR                                  |
| 4. Were the sources and resources used to search for studies adequate?              | YES                 | YES                      | UNCLEAR                                  |
| 5. Were the criteria for appraising studies appropriate?                            | YES                 | YES                      | NO                                       |
| 6. Was critical appraisal conducted by two or more reviewers independently?         | YES                 | UNCLEAR                  | YES                                      |
| 7. Were there methods to minimize errors in data extraction?                        | YES                 | UNCLEAR                  | YES                                      |
| 8. Were the methods used to combine studies appropriate?                            | YES                 | YES                      | YES                                      |
| 9. Was the likelihood of publication bias assessed?                                 | NA                  | NA                       | NA                                       |
| 10. Were recommendations for policy and/or practice supported by the reported data? | YES                 | YES                      | UNCLEAR                                  |
| 11. Were the specific directives for new research appropriate?                      | YES                 | YES                      | UNCLEAR                                  |

## 2. ROBIS individual and consensus ratings

| ROBIS Phase 2: IDENTIFYING CONCERNS WITH THE REVIEW PROCESS |       |                                      |     |     |     |     |          |                                                 |     |     |     |     |          |                                       |     |     |     |     |          |                                |     |     |     |     |     |          |
|-------------------------------------------------------------|-------|--------------------------------------|-----|-----|-----|-----|----------|-------------------------------------------------|-----|-----|-----|-----|----------|---------------------------------------|-----|-----|-----|-----|----------|--------------------------------|-----|-----|-----|-----|-----|----------|
| Systematic Review                                           | Rater | Domain 1. Study Eligibility Criteria |     |     |     |     |          | Domain 2. Identification & selection of studies |     |     |     |     |          | Domain 3. Data collection & Appraisal |     |     |     |     |          | Domain 4. Synthesis & Findings |     |     |     |     |     |          |
|                                                             |       | 1.1                                  | 1.2 | 1.3 | 1.4 | 1.5 | Concerns | 2.1                                             | 2.2 | 2.3 | 2.4 | 2.5 | Concerns | 3.1                                   | 3.2 | 3.3 | 3.4 | 3.5 | Concerns | 4.1                            | 4.2 | 4.3 | 4.4 | 4.5 | 4.6 | Concerns |
| Naidoo 2013 [15]                                            | 1     | PY                                   | PY  | PN  | PN  | PN  | HIGH     | Y                                               | NI  | Y   | PN  | Y   | LOW      | Y                                     | Y   | Y   | Y   | Y   | LOW      | Y                              | Y   | Y   | Y   | Y   | N   | LOW      |
|                                                             | 2     | PY                                   | PY  | PN  | PN  | PN  | HIGH     | Y                                               | NI  | Y   | PN  | Y   | LOW      | Y                                     | Y   | Y   | Y   | Y   | LOW      | Y                              | Y   | Y   | Y   | PY  | N   | LOW      |
|                                                             | 3     | PY                                   | PY  | PN  | PN  | PN  | HIGH     | Y                                               | NI  | Y   | PN  | Y   | LOW      | Y                                     | Y   | Y   | Y   | Y   | LOW      | Y                              | Y   | Y   | Y   | Y   | N   | LOW      |
| Goo et al., 2017 [41]                                       | 1     | PN                                   | Y   | Y   | Y   | Y   | UNCLEAR  | Y                                               | Y   | Y   | PY  | Y   | LOW      | NI                                    | Y   | Y   | Y   | PY  | LOW      | Y                              | NI  | Y   | Y   | Y   | N   | LOW      |
|                                                             | 2     | NI                                   | Y   | Y   | Y   | PN  | UNCLEAR  | Y                                               | Y   | Y   | PY  | Y   | LOW      | NI                                    | Y   | Y   | Y   | PY  | LOW      | Y                              | NI  | Y   | Y   | Y   | N   | LOW      |
|                                                             | 3     | PN                                   | Y   | Y   | Y   | N   | UNCLEAR  | Y                                               | Y   | Y   | PY  | Y   | LOW      | NI                                    | Y   | Y   | Y   | PY  | LOW      | Y                              | NI  | Y   | Y   | Y   | N   | LOW      |
| De Santos Moreno et al., 2023 [42]                          | 1     | PN                                   | PN  | N   | PY  | PY  | HIGH     | N                                               | Y   | PN  | PY  | Y   | HIGH     | Y                                     | PN  | PN  | N   | PY  | HIGH     | N                              | N   | PY  | PY  | PN  | N   | HIGH     |
|                                                             | 2     | PN                                   | PN  | PN  | PY  | PY  | HIGH     | N                                               | PY  | PN  | PY  | Y   | HIGH     | Y                                     | PN  | PY  | N   | PY  | HIGH     | N                              | N   | Y   | PY  | PN  | N   | HIGH     |
|                                                             | 3     | PN                                   | PN  | N   | PY  | PY  | HIGH     | N                                               | Y   | N   | PN  | Y   | HIGH     | Y                                     | PN  | PN  | N   | PY  | HIGH     | N                              | N   | PY  | PN  | PN  | PN  | HIGH     |

| ROBIS Phase 3: JUDGING RISK OF BIAS |       |          |          |          |          |                            |    |   |              |
|-------------------------------------|-------|----------|----------|----------|----------|----------------------------|----|---|--------------|
| Systematic Review                   | Rater | Domain 1 | Domain 2 | Domain 3 | Domain 4 | RISK OF BIAS OF THE REVIEW |    |   |              |
|                                     |       |          |          |          |          | A                          | B  | C | Overall risk |
| Naidoo 2013 [15]                    | 1     | HIGH     | LOW      | LOW      | LOW      | Y                          | Y  | Y | LOW          |
|                                     | 2     | HIGH     | LOW      | LOW      | LOW      | Y                          | Y  | Y | LOW          |
|                                     | 3     | HIGH     | LOW      | LOW      | LOW      | Y                          | Y  | Y | LOW          |
| Goo et al., 2017 [41]               | 1     | UNCLEAR  | LOW      | LOW      | LOW      | Y                          | Y  | Y | LOW          |
|                                     | 2     | UNCLEAR  | LOW      | LOW      | LOW      | Y                          | Y  | Y | LOW          |
|                                     | 3     | UNCLEAR  | LOW      | LOW      | LOW      | Y                          | Y  | Y | LOW          |
| De Santos Moreno et al., 2023 [42]  | 1     | HIGH     | HIGH     | HIGH     | HIGH     | PN                         | PN | Y | HIGH         |
|                                     | 2     | HIGH     | HIGH     | HIGH     | HIGH     | PN                         | PN | Y | HIGH         |
|                                     | 3     | HIGH     | HIGH     | HIGH     | HIGH     | PN                         | PN | Y | HIGH         |

Y: Yes; PY: Probably Yes; NI: No information; N: No; PN: Probably no

### PHASE 3: Judging Risk of Bias of the Review, signalling questions:

A: Did the interpretation of findings address all of the concerns identified in the Phase 2 assessment?

B: Was the relevance of the identified studies to the review's research question appropriately considered?

C: Did the reviewers avoid emphasizing results on the basis of their statistical significance?

**LOW risk of bias:** The findings of the review are likely to be reliable. Phase 2 did not raise any concerns with the review process or concerns were appropriately considered in the review conclusions. The conclusions were supported by the evidence and included consideration of the relevance of the included studies.

**HIGH risk of bias:** One or more of the concerns raised during the Phase 2 assessment was not addressed in the review conclusions, the review conclusions were not supported by the evidence, or the conclusions did not consider the relevance of the included studies to the review question.

**UNCLEAR risk of bias:** There is insufficient information reported to make a judgement on risk of bias.

### 3. AGREE II ratings of clinical algorithm (Naidoo/Govender [24])

| Domain                 | Item                           | Rater 1                 | Rater 2 | Rater 3 | Total | %   | Section %      |
|------------------------|--------------------------------|-------------------------|---------|---------|-------|-----|----------------|
| Scope                  | 1. Objective                   | 7                       | 7       | 7       | 21    | 100 | 59/63 94%      |
|                        | 2. Question                    | 6                       | 6       | 5       | 17    | 81  |                |
|                        | 3. Population                  | 7                       | 7       | 7       | 21    | 100 |                |
| Stakeholders           | 4. Professionals               | 7                       | 7       | 7       | 21    | 100 | 52/63 82.5%    |
|                        | 5. Patients                    | 3                       | 4       | 3       | 10    | 48  |                |
|                        | 6. Users defined               | 7                       | 7       | 7       | 21    | 100 |                |
| Rigor                  | 7. Evidence search             | 7                       | 7       | 7       | 21    | 100 | 145/168<br>86% |
|                        | 8. Criteria                    | 7                       | 7       | 7       | 21    | 100 |                |
|                        | 9. Strengths and limitations   | 6                       | 6       | 5       | 17    | 81  |                |
|                        | 10. Recommendation formulation | 7                       | 7       | 6       | 20    | 95  |                |
|                        | 11. Benefits and risks         | 6                       | 6       | 6       | 18    | 86  |                |
|                        | 12. Evidence linked            | 7                       | 7       | 7       | 21    | 100 |                |
|                        | 13. Expert review              | 7                       | 7       | 7       | 21    | 100 |                |
|                        | 14. Updating procedure         | 2                       | 2       | 2       | 6     | 29  |                |
| Clarity                | 15. Recommendations            | 6                       | 6       | 5       | 17    | 81  | 51/63 81%      |
|                        | 16. Management options         | 5                       | 5       | 5       | 15    | 71  |                |
|                        | 17. Key recommendations        | 7                       | 6       | 6       | 19    | 90  |                |
| Applicability          | 18. Barriers and facilitators  | 5                       | 6       | 4       | 15    | 71  | 50/84 59%      |
|                        | 19. Advice/tools               | 6                       | 6       | 4       | 16    | 76  |                |
|                        | 20. Resource implications      | 4                       | 5       | 4       | 13    | 62  |                |
|                        | 21. Monitoring/auditing        | 2                       | 2       | 2       | 6     | 29  |                |
| Editorial independence | 22. Funding independence       | 7                       | 7       | 7       | 21    | 100 | 42/42 100%     |
|                        | 23. Competing interests        | 7                       | 7       | 7       | 21    | 100 |                |
| Overall quality        |                                | 6                       | 6       | 6       |       |     | 18/21 86%      |
| Recommendation         |                                | Yes, with modifications |         |         |       |     |                |

#### 4: Mixed Methods Appraisal Tool (MMAT), version 2018

[http://mixedmethodsappraisaltoolpublic.pbworks.com/w/file/fetch/127916259/MMAT\\_2018\\_criteria-manual\\_2018-08-01\\_ENG.pdf](http://mixedmethodsappraisaltoolpublic.pbworks.com/w/file/fetch/127916259/MMAT_2018_criteria-manual_2018-08-01_ENG.pdf)

|                                |         | Methodological quality criteria |            |   |            |   |                                                                          |
|--------------------------------|---------|---------------------------------|------------|---|------------|---|--------------------------------------------------------------------------|
| Category and study             |         | 1                               | 2          | 3 | 4          | 5 | Comments by reviewers                                                    |
| 1. Qualitative                 |         |                                 |            |   |            |   |                                                                          |
| Govender & Joubert 2016[21]    | Rater 1 | Y                               | Y          | Y | Can't tell | Y | No quotes used to substantiate comments - just a summary by the author   |
|                                | Rater 2 | Y                               | Y          | Y | Can't tell | Y |                                                                          |
|                                | Rater 3 | Y                               | Y          | Y | Can't tell | Y |                                                                          |
| 3. Quantitative non-randomized |         |                                 |            |   |            |   |                                                                          |
| Segal et al., 2016 [23]        | Rater 1 | Y                               | Can't tell | Y | Y          | Y | Limited psychometric properties of the muscle tone assessment            |
|                                | Rater 2 | Y                               | N          | Y | Y          | Y |                                                                          |
|                                | Rater 3 | Y                               | N          | Y | Y          | Y |                                                                          |
| 4. Quantitative descriptive    |         |                                 |            |   |            |   |                                                                          |
| Naidoo 2013b [18]              | Rater 1 | Y                               | Y          | Y | Y          | Y | Sample calculation adequate<br>Survey tool development excellent quality |
|                                | Rater 2 | Y                               | Y          | Y | Y          | Y |                                                                          |
|                                | Rater 3 | Y                               | Y          | Y | Y          | Y |                                                                          |
| Naidoo & Joubert 2013 [20]     | Rater 1 | Y                               | Y          | Y | Y          | Y |                                                                          |
|                                | Rater 2 | Y                               | Y          | Y | Y          | Y |                                                                          |
|                                | Rater 3 | Y                               | Y          | Y | Y          | Y |                                                                          |
| 5. Mixed-methods               |         |                                 |            |   |            |   |                                                                          |
| Govender & Joubert 2018 [24]   | Rater 1 | Y                               | Y          | Y | Y          | Y |                                                                          |
|                                | Rater 2 | Y                               | Y          | Y | Y          | Y |                                                                          |
|                                | Rater 3 | Y                               | Y          | Y | Y          | Y |                                                                          |

**1. Qualitative** 1.1. Is the qualitative approach appropriate to answer the research question? 1.2. Are the qualitative data collection methods adequate to address the research question? 1.3. Are the findings adequately derived from the data? 1.4. Is the interpretation of results sufficiently substantiated by data? 1.5. Is there coherence between qualitative data sources, collection, analysis and interpretation?

**3. Quantitative nonrandomized** 3.1. Are the participants representative of the target population? 3.2. Are measurements appropriate regarding both the outcome and intervention (or exposure)? 3.3. Are there complete outcome data? 3.4. Are the confounders accounted for in the design and analysis? 3.5. During the study period, is the intervention administered (or exposure occurred) as intended?

**4. Quantitative descriptive** 4.1. Is the sampling strategy relevant to address the research question? 4.2. Is the sample representative of the target population? 4.3. Are the measurements appropriate? 4.4. Is the risk of nonresponse bias low? 4.5. Is the statistical analysis appropriate to answer the research question?

**5. Mixed methods** 5.1. Is there an adequate rationale for using a mixed methods design to address the research question? 5.2. Are the different components of the study effectively integrated to answer the research question? 5.3. Are the outputs of the integration of qualitative and quantitative components adequately interpreted? 5.4. Are divergences and inconsistencies between quantitative and qualitative results adequately addressed? 5.5. Do the different components of the study adhere to the quality criteria of each tradition of the methods involved?

## 5. COSMIN reliability evidence ratings

| Measure                                   | Subjective                                        | Hammersmith Infant Neurological Examination (HIINE)              |                                                            |                                                                    |                                                                  |                                                                  |                                                            |                                                     |                                                     |
|-------------------------------------------|---------------------------------------------------|------------------------------------------------------------------|------------------------------------------------------------|--------------------------------------------------------------------|------------------------------------------------------------------|------------------------------------------------------------------|------------------------------------------------------------|-----------------------------------------------------|-----------------------------------------------------|
| ROB Reliability                           | Wessel et al., 2013 [22]<br>n = 57<br>Inter-rater | Tedla et al., 2014 [72]<br>n = 31<br>Inter-rater<br>Global score | Tedla et al., 2014 [72]<br>n = 31<br>Inter-rater<br>Grades | Adıgüzel et al., 2022[77]<br>n = 35<br>Inter-rater<br>Global score | Romeo et al., 2022 [75]<br>n = 100<br>Inter-rater<br>Item scores | Tedla et al., 2014 [72]<br>n = 31<br>Intra-rater<br>Global score | Tedla et al., 2014 [72]<br>n = 31<br>Intra-rater<br>Grades | Harpster et al., 2022 [79]<br>n = 15<br>Intra-rater | Adıgüzel et al., 2022 [77]<br>n = 35<br>Intra-rater |
| 1. Stability of patients                  | Very good                                         | Very good                                                        | Very good                                                  | Very good                                                          | Doubtful                                                         | Very good                                                        | Very good                                                  | Doubtful                                            | Very good                                           |
| 2. Time interval                          | Very good                                         | Very good                                                        | Very good                                                  | Very good                                                          | Doubtful                                                         | Very good                                                        | Very good                                                  | Doubtful                                            | Very good                                           |
| 3. Similarity of measurement condition    | Very good                                         | Adequate assignment                                              | Adequate - assignment                                      | Adequate Assignment                                                | Doubtful                                                         | Adequate - from video                                            | Adequate - from video                                      | Adequate                                            | Adequate - from video                               |
| 4. Administration without knowledge       | Adequate                                          | Adequate Rater 1                                                 | Adequate Rater 1                                           | Very good Rater 1                                                  | Doubtful                                                         | NA                                                               | NA                                                         | Very good                                           | NA                                                  |
| 5. Assignment without knowledge           | Adequate                                          | Adequate                                                         | Adequate                                                   | Very good                                                          | Doubtful                                                         | Adequate                                                         | Adequate                                                   | Very good                                           | Very good                                           |
| 6. Other important flaws                  | Very good                                         | Very good                                                        | Doubtful                                                   | Very good                                                          | Very good                                                        | Very good                                                        | Doubtful                                                   | Very good                                           | Very good                                           |
| Statistical                               |                                                   |                                                                  |                                                            |                                                                    |                                                                  |                                                                  |                                                            |                                                     |                                                     |
| 7. Continuous scores: ICC or correlation? | NA                                                | Adequate - no formula                                            | ICC for dichotomous                                        | Adequate - no formula                                              | Adequate                                                         | Adequate - no formula                                            | ICC for dichotomous                                        | Adequate - no formula                               | Adequate - no formula                               |
| 8. Ordinal scores: Weighted kappa?        | NA                                                | NA                                                               |                                                            | NA                                                                 | NA                                                               | NA                                                               | NA                                                         | NA                                                  | NA                                                  |
| 9. Dichotomous/nominal unweighted kappa   | Very good                                         |                                                                  | No - doubtful                                              | NA                                                                 | NA                                                               | NA                                                               | No - doubtful                                              | NA                                                  | NA                                                  |
| Final rating                              | Adequate                                          | Adequate                                                         | Doubtful                                                   | Adequate                                                           | Doubtful                                                         | Adequate                                                         | Doubtful                                                   | Doubtful                                            | Adequate                                            |

ICC: intraclass correlation coefficient; Grades: optimal/suboptimal scores; NA: question not appropriate for this study

## 6. COSMIN validity evidence ratings

### Box 8 Criterion validity: Predictive and concurrent

Gold standards = CP diagnosis; Bayley; INFANIB; AIMS; Hypotonia (expert rater)

|                                                                | Objective                                                                | Hammersmith Infant Neurological Examination (HINE)                     |                                                                                      |                                                                        |                                                                        |                                                                    |                                                                      |                                                                                |
|----------------------------------------------------------------|--------------------------------------------------------------------------|------------------------------------------------------------------------|--------------------------------------------------------------------------------------|------------------------------------------------------------------------|------------------------------------------------------------------------|--------------------------------------------------------------------|----------------------------------------------------------------------|--------------------------------------------------------------------------------|
| Statistical                                                    | Soucy et al., 2016 [14]<br>Objective measures and expert rater<br>n = 55 | Tedla et al., 2014 [72]<br>Global scores<br>HINE and INFANIB<br>n = 31 | Tedla et al., 2014 [72]<br>Optimal/suboptimal grade: HINE and Pediatrician<br>n = 31 | Romeo et al., 2016 [70] 7 studies<br>HINE and CP diagnosis<br>n = 2709 | Romeo et al., 2022 [73]<br>preterm infants<br>HINE and MDI<br>n = 1229 | Romeo et al., 2021 [74]<br>term infants<br>HINE and MDI<br>n = 446 | Pietruszewski et al., 2022 [78]<br>HINE and CP diagnosis<br>n = 1389 | Jansen Van Rensburg 2022 [71]<br>High risk infants<br>HINE and AIMS<br>n = 100 |
| 1. Continuous scores: correlations or AUC calculated?          | NA                                                                       | ICC correlation not AUC                                                | Used ICC for dichotomous                                                             |                                                                        | Very good                                                              | Very good                                                          | Very good                                                            | Very good                                                                      |
| 2. Dichotomous scores: sensitivity and specificity determined? | Very good                                                                | NA                                                                     | No - Doubtful                                                                        | Very good                                                              | Very good                                                              | Very good                                                          | Very good                                                            | Very good                                                                      |
| Other                                                          |                                                                          |                                                                        |                                                                                      |                                                                        |                                                                        |                                                                    |                                                                      |                                                                                |
| 3. Other important flaws in the design or statistical methods? | Very good                                                                | Question stats - Doubtful                                              | Very good                                                                            | Very good                                                              | Very good                                                              | Very good                                                          | Very good                                                            | Very good                                                                      |
| COSMIN overall                                                 | Very good                                                                | Doubtful                                                               | Doubtful                                                                             | Very good                                                              | Very good                                                              | Very good                                                          | Very good                                                            | Very good                                                                      |

AIMS: Alberta Infant Motor Scales; AUC: Area under the receiver operating curve; CP: cerebral palsy; HINE: Hammersmith Infant Neurological Examination; ICC: intraclass correlation coefficient; INFANIB: Infant Neurological International Battery; MDI: Mental Developmental Index (from Bayley II scales)

### Box 9 Hypotheses testing for construct validity: Comparison of HINE with other instruments - convergent validity

| Design Convergent                                              | Uusitalo et al., 2021 [76] n = 174 | Harpster et al., 2022 [79] n = 392        | Harpster et al., 2022 [79] n = 392 | Adigüzel et al., 2022 [77] n = 35                          |
|----------------------------------------------------------------|------------------------------------|-------------------------------------------|------------------------------------|------------------------------------------------------------|
| 1. Is it clear what the comparator measures?                   | WISC - IQ<br>Very good             | MRI - brain structure/damage<br>Very good | GMA<br>Very good                   | BSID III<br>Cognitive, Language, Motor scales<br>Very good |
| 2. Measurement properties of the comparator sufficient?        | Very good                          | Very good                                 | Very good                          | Very good                                                  |
| Statistical                                                    |                                    |                                           |                                    |                                                            |
| 3. Statistical method appropriate?                             | Very good                          | Very good                                 | Very good                          | Very good                                                  |
| Other                                                          |                                    |                                           |                                    |                                                            |
| 4. Any other important flaws in design or statistical methods? | Very good                          | Very good                                 | Very good                          | Very good                                                  |
| Overall COSMIN                                                 | Very good                          | Very good                                 | Very good                          | Very good                                                  |

BSID III: Bayley Scales of Infant Development version III; GMA: Prechtl's General Movements Assessment; IQ: intelligence quotient; MRI: magnetic resonance imaging; WISC: Weschler Intelligence Scale for children 4th edition

## References

14. Soucy, E.A.; Wessel, E.A.; Gau, F.; Albers, A.C.; Gutman, D.H.; Dunn, C.M. A pilot study for evaluation of hypotonia in children with neurofibromatosis type 1. *J Child Neurol* **2015**, *30*, 382-385 doi:10.1177/0883073814531823
15. Naidoo, P. Towards evidence-based practice - A systematic review of methods and tests used in the clinical assessment of hypotonia. *South African J Occup Ther.* **2013**, *43*, 2-8.
18. Naidoo, P. Current practices in the assessment of hypotonia in children. *South African J Occup Ther.* **2013**, *43*, 12-1.
20. Naidoo, P.; Joubert, R.W.E. Consensus on hypotonia via delphi process. *Indian J Pediatr.* **2013**, *80*, 641-650. doi:10.1007/s12098-013-1018-7
21. Govender, P.; Joubert, R.W.E. 'Toning' up hypotonia assessment: A proposal and critique. *African J Disabil.* **2016**, *5*, 231: doi: 10.4102/ajod.v5i1.231
22. Wessel, L.E.; Albers, A.C.; Goutmann, D.H.; Dunn, C.M. The association between hypotonia and brain tumors in children with neurofibromatosis type 1. *J Child Neurol.* **2013**, *28*, 1664-1667. doi:10.1177/0883073812460918
23. Segal, I.; Peylan, T.; Sucre, J.; Levi, L.; Bassan, H. Relationship between central hypotonia and motor development in infants attending a high-risk neonatal neurology clinic. *Pediatr Phys Ther.* **2016**, *28*, 322-336. doi:10.1097/PEP.0000000000000265
24. Govender, P.; Joubert, R.W.E. Evidence-based clinical algorithm for hypotonia assessment: To pardon the errs. *Occup Ther Int.* **2018**, *89675*, 1-7. doi:10.1155/2018/8967572
70. Romeo, D.M.; Ricci, D.; Brogna, C.; Mercuri, E. Use of the Hammersmith Infant Neurological Examination in infant with cerebral palsy: A critical review of the literature. *Dev Med Child Neurol.* **2016**, *58*, 240245. doi:10.1111/dmcn.12876
71. Jansen van Rensburg, E.A.; Burger, M; Unger, M. The predictive validity of Hammersmith Infant Neurological Examination versus Prechtl's General Movement Assessment with the Motor Optimality Score on gross motor outcomes in high-risk infants at 12-15 months corrected age: a descriptive study. MSc thesis 2022 <https://scholar.sun.ac.za>
72. Tedla, J.S.; Bajaj, A.; Joshua, A.M.; Kamath, G. Psychometric properties of Hammersmith Infant Neurological Examination in 12 months old high-risk infants: A cross-sectional study. *Indian J Physiother Occup Ther-An Int J.* **2014**, *8*, 169. doi:10.5958/j.0973-5674.8.2.081
73. Romeo, D.M.; Cowan, F.M.; Haataja, L.; Ricci, D.; Pede, E.; Gallini, F.; Cota, F.; Brogna, C.; Romeo, M.G.; Vento, G.; Mercuri, E. Hammersmith Infant Neurological Examination for infants born preterm: predicting outcomes other than cerebral palsy. *Dev Med Child Neurol.* **2021**, *63*, 939-946. doi:10.1111/dmcn.14768

74. Romeo, D.M.; Cowan, F.M.; Haataja, L.; Ricci, D.; Pede, E.; Gallini, F.; Cota, F.; Brogna, C.; Romeo, M.G.; Vento, G.; Mercuri, E. Hammersmith Infant Neurological Examination in infants born at term: Predicting outcome other than cerebral palsy. *Dev Med Child Neurol.* **2022**, *64*, 871-880. doi:10.1111/dmcn.15191
75. Romeo, D.M.; Apicella, M.; Velli, C.; Brogna, C.; Ricci, D.; Pede, E.; Sini, F.; Coratti, G.; Gallini, F.; Cota, F.; Bovis, F.; Vento, G.; Mercuri, E. Hammersmith Infant Neurological Examination in low-risk infants born very preterm: a longitudinal prospective study. *Dev Med Child Neurol.* **2022**, *64*, 863-870. doi:10.1111/dmcn.14873
76. Uusitalo, K.; Haataja, L.; Nyman, A.; Lehtonen, T; Setänen, S. Hammersmith Infant Neurological Examination and long-term cognitive outcome in children born very preterm. *Dev Med Child Neurol.* **2021**, *63*, 947-953.
77. Adıgüzel, H.; Ünal Sarıkabadayı, Y.; Apaydın, U.; Katırcı Kırmacı, Z.I.; Gücüyener, K.; Günel Karadeniz, P.; Elbasan, B. Turkish validity and reliability of the Hammersmith Infant Neurological Examination (HINE) with high-risk infant group: A preliminary study. *Turkish Arch Pediatr.* **2022**, *57*, 151-159. doi:10.5152/TurkArchPediatr.2022.21231
78. Pietruszewski, L.; Moore-Clingenpeel, M.; Moellering, G.C.J.; Lewandowski, D.; Batterson, N.; Maitre, N.L. Predictive value of the test of infant motor performance and the Hammersmith infant neurological examination for cerebral palsy in infants. *Early Hum Dev.* **2022**, *174*, 105665. doi:10.1016/j.earlhumdev.2022.105665
79. Harpster, K.; Merhar, S.; Priyanka Illapani, V.S.; Peyton, C.; Kline-Fath, B.; Parikh, N.A. Associations Between Early Structural Magnetic Resonance Imaging, Hammersmith Infant Neurological Examination, and General Movements Assessment in Infants Born Very Preterm. *J Pediatr.* **2021**, *232*, 80-86.e2. doi:10.1016/j.jpeds.2020.12.056
